# Supplementary material for: Randomized control trial of Tools of the Mind: Marked benefits to kindergarten children and their teachers
Source: PLOS journal article supplement (doi:10.1371/journal.pone.0222447), 2019-09-17
Supplement: S6 (10.1371/journal.pone.0222447.s006) [file journal.pone.0222447.s006]

Two Writing Samples from Kindergarten Children in *Tools of the Mind*

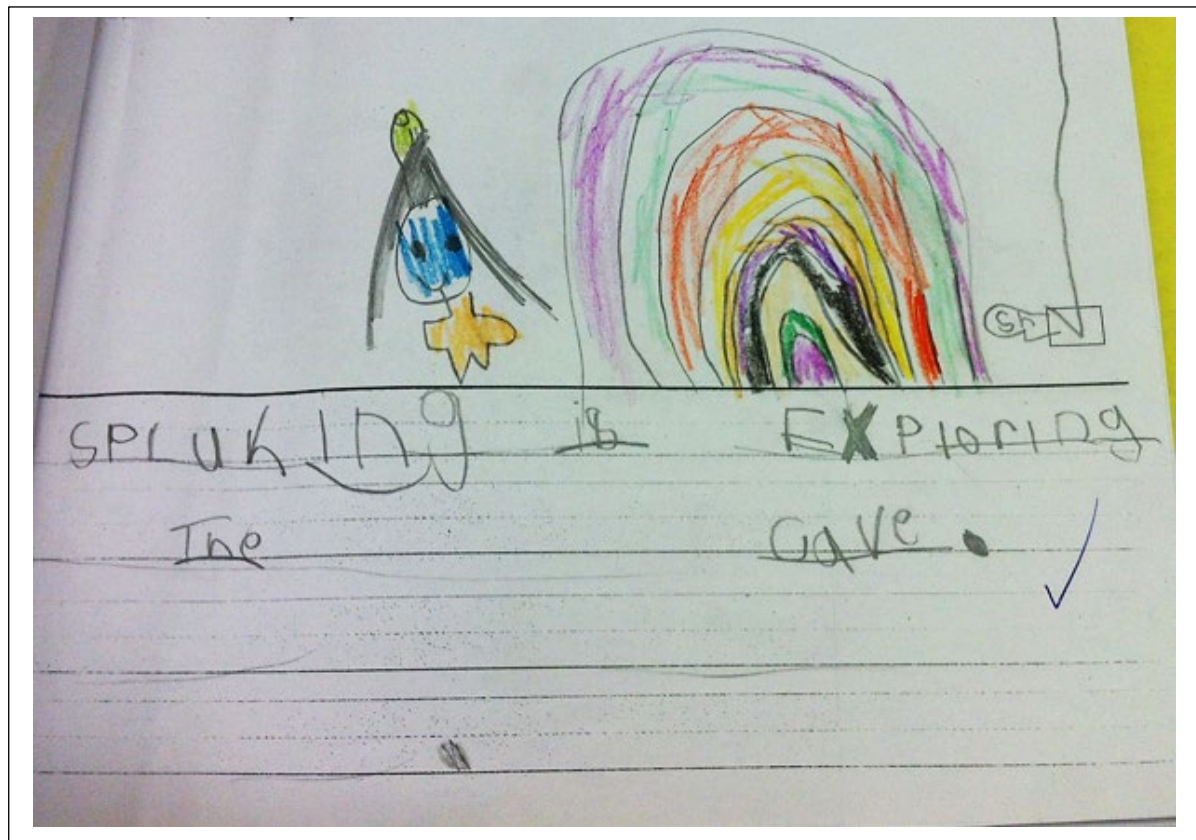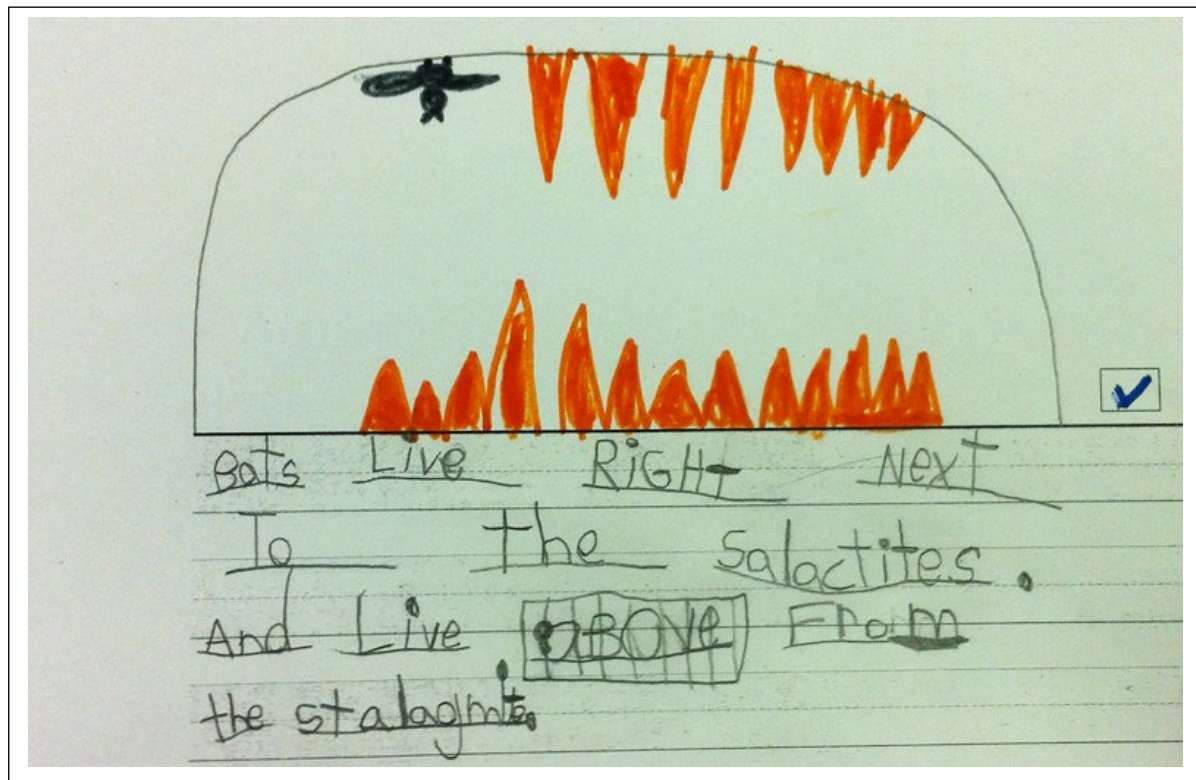

These were written the week after the children had had a lesson on caves.
